# Supplementary material for: Automated Image Threshold Method Comparison for Conjunctival Vessel Quantification on Optical Coherence Tomography Angiography
Source: PubMed Central journal article supplement (PMC9315074; doi:10.1167/tvst.11.7.15), 2022-07-20
Supplement: tvst-11-7-15_s001.pdf [file tvst-11-7-15_s001.pdf]

**Supplemental Table - Agreement of Other Threshold Methodologies**

| Threshold Methodologies                                          | Mean Grey Value VD (%) | ±SD Grey Value VD (%) | ICC   | 95% Confidence Intervals |             |
|------------------------------------------------------------------|------------------------|-----------------------|-------|--------------------------|-------------|
|                                                                  |                        |                       |       | Lower Bound              | Upper Bound |
| 1. Median Local Threshold                                        | 40.7                   | ±4.9                  | 0.453 | -0.085                   | 0.823       |
| 2. Close Morphology (1pxl) + Median Local Threshold              | 40.6                   | ±4.8                  | 0.450 | -0.087                   | 0.821       |
| 3. Close Morphology (1pxl) + Otsu Local Threshold                | 28.6                   | ±5.0                  | 0.494 | -0.106                   | 0.826       |
| 4. Close Morphology (2pxl) + Median Local Threshold              | 40.3                   | ±4.7                  | 0.468 | -0.091                   | 0.829       |
| 5. Close Morphology (2pxl) + Otsu Local Threshold                | 29.0                   | ±4.9                  | 0.509 | -0.097                   | 0.832       |
| 6. Tophat Filter + Otsu Local Threshold                          | 19.9                   | ±3.3                  | 0.136 | -0.026                   | 0.502       |
| 7. Bandpass Filter + Gaussian Blur + Mean Local Threshold        | 38.0                   | ±4.9                  | 0.652 | -0.079                   | 0.902       |
| 8. Bandpass Filter + Otsu Local Threshold                        | 29.1                   | ±4.9                  | 0.602 | -0.098                   | 0.886       |
| 9. Frangi Filter + Otsu Local Threshold                          | 29.4                   | ±4.3                  | 0.360 | -0.189                   | 0.737       |
| 10. Frangi Filter + Phansalkar Local Threshold                   | 39.1                   | ±5.7                  | 0.465 | -0.065                   | 0.790       |
| 11. Bandpass Filter + Tophat Filter + Otsu Local Threshold       | 20.4                   | ±3.1                  | 0.142 | -0.029                   | 0.508       |
| 12. Bandpass Filter + Tophat Filter + Phansalkar Local Threshold | 29.3                   | ±4.2                  | 0.576 | -0.099                   | 0.871       |
| <b>Gold Standard Images</b>                                      | 33.9                   | ±5.7                  | -     | -                        | -           |

Intraclass correlation coefficient (ICC) agreement for other variations of threshold methodologies. VD= vessel density; SD= standard deviation; pxl= pixel.
